# Supplementary material for: Soft-Shelled Turtle Peptide Supplementation Modifies Energy Metabolism and Oxidative Stress, Enhances Exercise Endurance, and Decreases Physical Fatigue in Mice
Source: MDPI journal article supplement (doi:10.3390/foods11040600), 2022-02-19
Supplement: s1 [file s1]

**Table S1. The basic components of STP**

|     | Moisture<br>(%) | Ash<br>(%) | Total protein<br>(%) | Peptide content<br>(%) |
|-----|-----------------|------------|----------------------|------------------------|
| STP | 4.92±0.06       | 1.32±0.05  | 90.84±0.45           | 87.90±0.08             |

**Table S2. Amino acid composition of the STP**

| Amino acids           | Content (mg/g) | Ratio (%) |
|-----------------------|----------------|-----------|
| Aspartic acid         | 59.81          | 7.86      |
| Glutamic acid         | 115.02         | 15.11     |
| Serine                | 23.72          | 3.12      |
| Glycine               | 119.99         | 15.76     |
| Histidine             | 9.18           | 1.21      |
| Arginine              | 31.28          | 4.11      |
| Threonine*            | 22.84          | 3.00      |
| Alanine               | 56.15          | 7.38      |
| Proline               | 65.96          | 8.67      |
| Tyrosine              | 21.14          | 2.78      |
| Valine*               | 35.00          | 4.60      |
| Methionine*           | 14.89          | 1.96      |
| Cystine               | 12.22          | 1.61      |
| Isoleucine*           | 50.61          | 6.65      |
| Leucine*              | 49.09          | 6.45      |
| Phenylalanine*        | 23.68          | 3.11      |
| Lysine*               | 50.59          | 6.65      |
| Tryptophan            | ND             | ND        |
| Essential amino acids | 246.67         | 32.41     |
| Total amino acids     | 761.17         | 100       |

“\*” represents essential amino acids, “ND” represents not detected.

**Table S3 Molecular mass distribution of STP**

| Molecular mass (Da) | Retention time (min) | Ratio of Area/(%) |
|---------------------|----------------------|-------------------|
| 3000-5000           | 14.49-15.41          | 0.11              |
| 2000-3000           | 15.41-16.98          | 0.60              |
| 1000-2000           | 16.98-18.31          | 6.06              |
| 500-1000            | 18.31-19.86          | 23.68             |
| 180-500             | 19.86-20.47          | 56.05             |
| <180                | 20.47                | 13.50             |

**Table S4.** Mice weigh and energy intake

| Group   | Body weight(g) |            |            | Food intake<br>(g/d) | Energy intake<br>(g/d) |
|---------|----------------|------------|------------|----------------------|------------------------|
|         | Initial        | Terminal   | Increased  |                      |                        |
| Control | 26.02±1.46     | 36.01±3.44 | 9.99±2.81  | 4.72±0.22            | 17.45±0.80             |
| WP      | 26.10±1.46     | 37.19±2.92 | 11.09±2.41 | 4.85±0.37            | 17.95±1.37             |
| STP-L   | 25.99±1.22     | 35.74±2.37 | 9.74±2.40  | 4.67±0.35            | 17.30±1.30             |
| STP-M   | 25.78±1.16     | 36.51±2.53 | 10.73±2.49 | 4.66±0.12            | 17.23±0.45             |
| STP-H   | 25.94±1.15     | 35.93±2.69 | 9.99±2.14  | 4.71±0.18            | 17.44±0.66             |

### 动物实验伦理审查同意书

Affidavit of Approval of Animal Ethical and Welfare

|        |             |                      |                   |
|--------|-------------|----------------------|-------------------|
| 伦理申请编号 | 201909-0450 | 批准编号<br>Approval No. | IACUC-20190930-07 |
|--------|-------------|----------------------|-------------------|

本《动物实验方案》经过实验动物管理与伦理委员会审核，符合动物保护、动物福利和伦理原则，符合国家实验动物福利伦理的相关规定。方案的相关信息如下：

The Animal experiment protocol listed below has been reviewed and approved by Laboratory animal management and ethics committee of ZCMU.

|                                 |                                                                                                                |                                          |                 |                    |                   |
|---------------------------------|----------------------------------------------------------------------------------------------------------------|------------------------------------------|-----------------|--------------------|-------------------|
| 实验名称<br>Protocol Title          | 甲鱼肽的抗疲劳作用<br>Anti-fatigue function of soft-shelled turtle peptides in mice                                     |                                          |                 |                    |                   |
| 申请人姓名<br>Applicant              | 史晋源<br>Shi Jinyuan                                                                                             | 职称/学位<br>Title/Degree                    | 硕士<br>master    | 邮箱<br>Email        | 970354908@qq.com  |
| 实验负责人<br>Principal Investigator | 冯凤琴<br>Feng Fengqin                                                                                            | 职称/学位<br>Title/Degree                    | 教授<br>professor | 邮箱<br>Email        | fengfq@zju.edu.cn |
| 院系<br>(部门)<br>Department        | 浙江大学生物系统与食品科学学院<br>college of biosystems engineering and food science, zhejiang university                     |                                          |                 |                    |                   |
| 拟实验时间<br>Period of Protocol     | 2019-11-01<br>-<br>2019-12-31                                                                                  | 实验动物使用许可证<br>Number of Animal Use Permit |                 | SYXK (浙) 2018-0012 |                   |
| 审核意见<br>Results of Inspection   | <input type="checkbox"/> 符合动物福利伦理要求，可以进行实验。 Agree<br><input type="checkbox"/> 调整方案后，可以进行实验。 Agree after modify |                                          |                 |                    |                   |

浙江中医药大学实验动物管理与伦理委员会  
Animal Ethical and Welfare Committee of ZCMU

中心IACUC主席 (Chairman) :

日期 (Date):

Figure S1 Approval of local ethical commission for animal experiment
